# Supplementary material for: Schisandra rubriflora Fruit and Leaves as Promising New Materials of High Biological Potential: Lignan Profiling and Effect-Directed Analysis
Source: MDPI journal article supplement (doi:10.3390/molecules27072116), 2022-03-25
Supplement: s1 [file s1]

# ***Schisandra rubriflora* fruit and leaves as promising new materials of high biological potential: lignan profiling and effect-directed analysis**

**Ewelina Sobstyl<sup>1</sup>, Agnieszka Szopa<sup>2\*</sup>, Michał Dziurka<sup>3</sup>, Halina Ekiert<sup>2</sup>, Hanna Nikolaichuk<sup>1,4</sup>, Irena Maria Choma<sup>1\*\*</sup>**

<sup>1</sup> Department of Chromatography, Faculty of Chemistry, University of M. Curie-Skłodowska, M. Curie-Skłodowska Sq. 3, 20-031 Lublin, Poland; irena.choma@mail.umcs.pl (I.M.Ch.), ewelina.sobstyl@gmail.com (E.S.), hanna.nikolaichuk@gmail.com (H.N.)

<sup>2</sup> Chair and Department of Pharmaceutical Botany, Jagiellonian University, Medical College, Medyczna Str. 9, 30-688 Kraków, Poland; a.szopa@uj.edu.pl (A.S.), halina.ekiert@uj.edu.pl (H.E.)

<sup>3</sup> Polish Academy of Sciences, The Franciszek Górski Institute of Plant Physiology, Niezapominajek Str. 21, 30-239 Kraków, Poland; m.dziurka@ifr-pan.edu.pl (M.D.)

<sup>4</sup> Department of Bioanalytics, Faculty of Biomedicine, Medical University of Lublin, Jaczewskiego Str. 8b, 20-090, Lublin, Poland; hanna.nikolaichuk@gmail.com (H.N.)

**Correspondence:** \*Agnieszka Szopa (A.S.): phone +48 12 620 54 36, fax +48 620 54 40, e-mail: a.szopa@uj.edu.pl, ORCID: 0000-0002-6351-4047; \*\*Irena M. Choma (I.M.Ch.): phone +48 792 677 004, e-mail: irena.choma@mail.umcs.pl, ORCID: 0000-0002-6878-3748

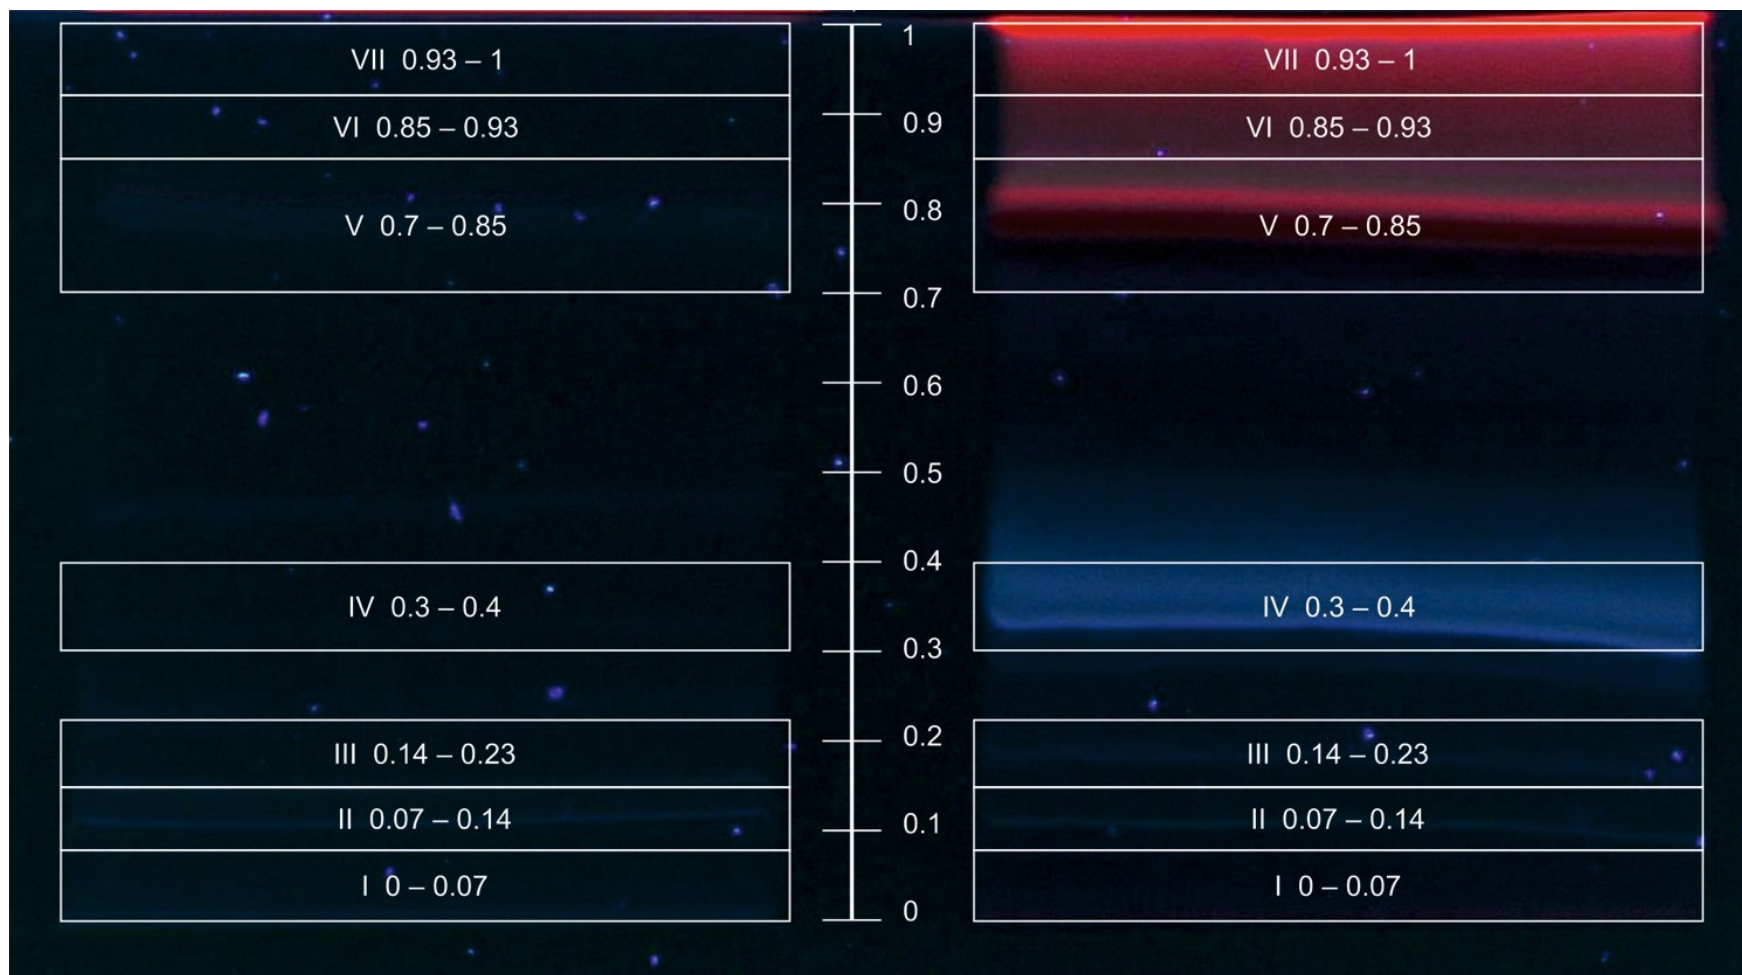

**Figure S1.**  
TLC micro-preparative analysis of *S. rubriflora* extracts (left: male leaves, right: fruits) (366 nm).

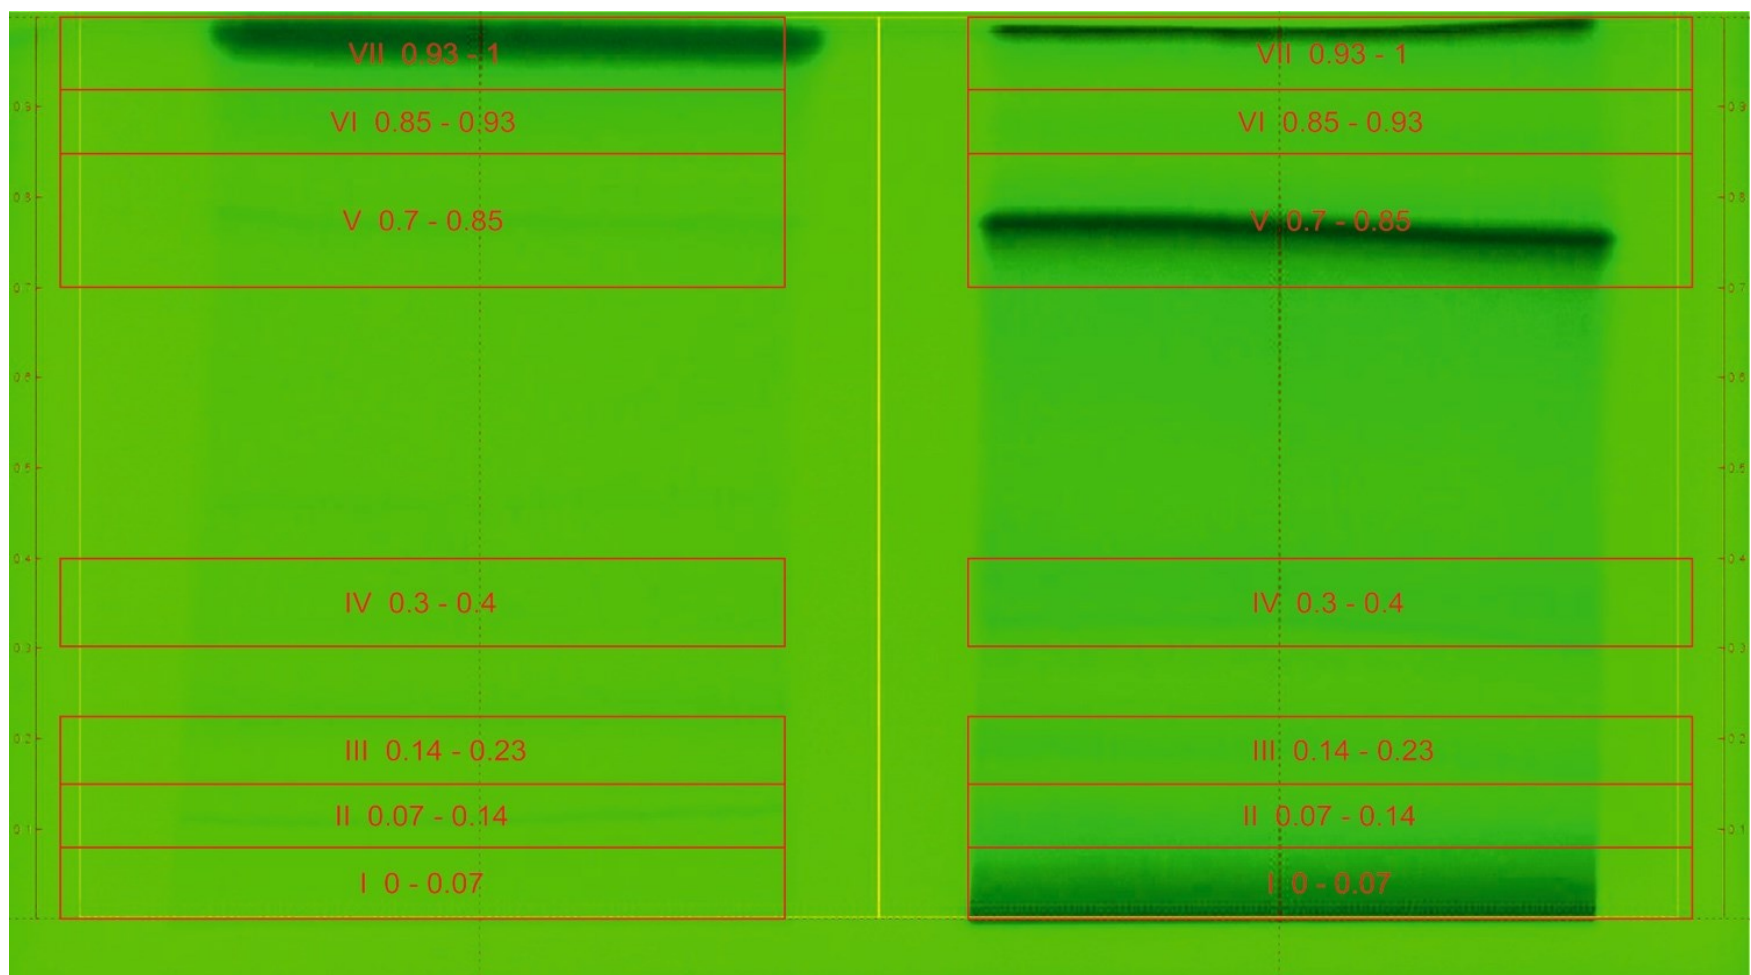

**Figure S2.**  
TLC micro-preparative analysis of *S. rubriflora* extracts (left: male leaves, right: fruits) (254 nm).

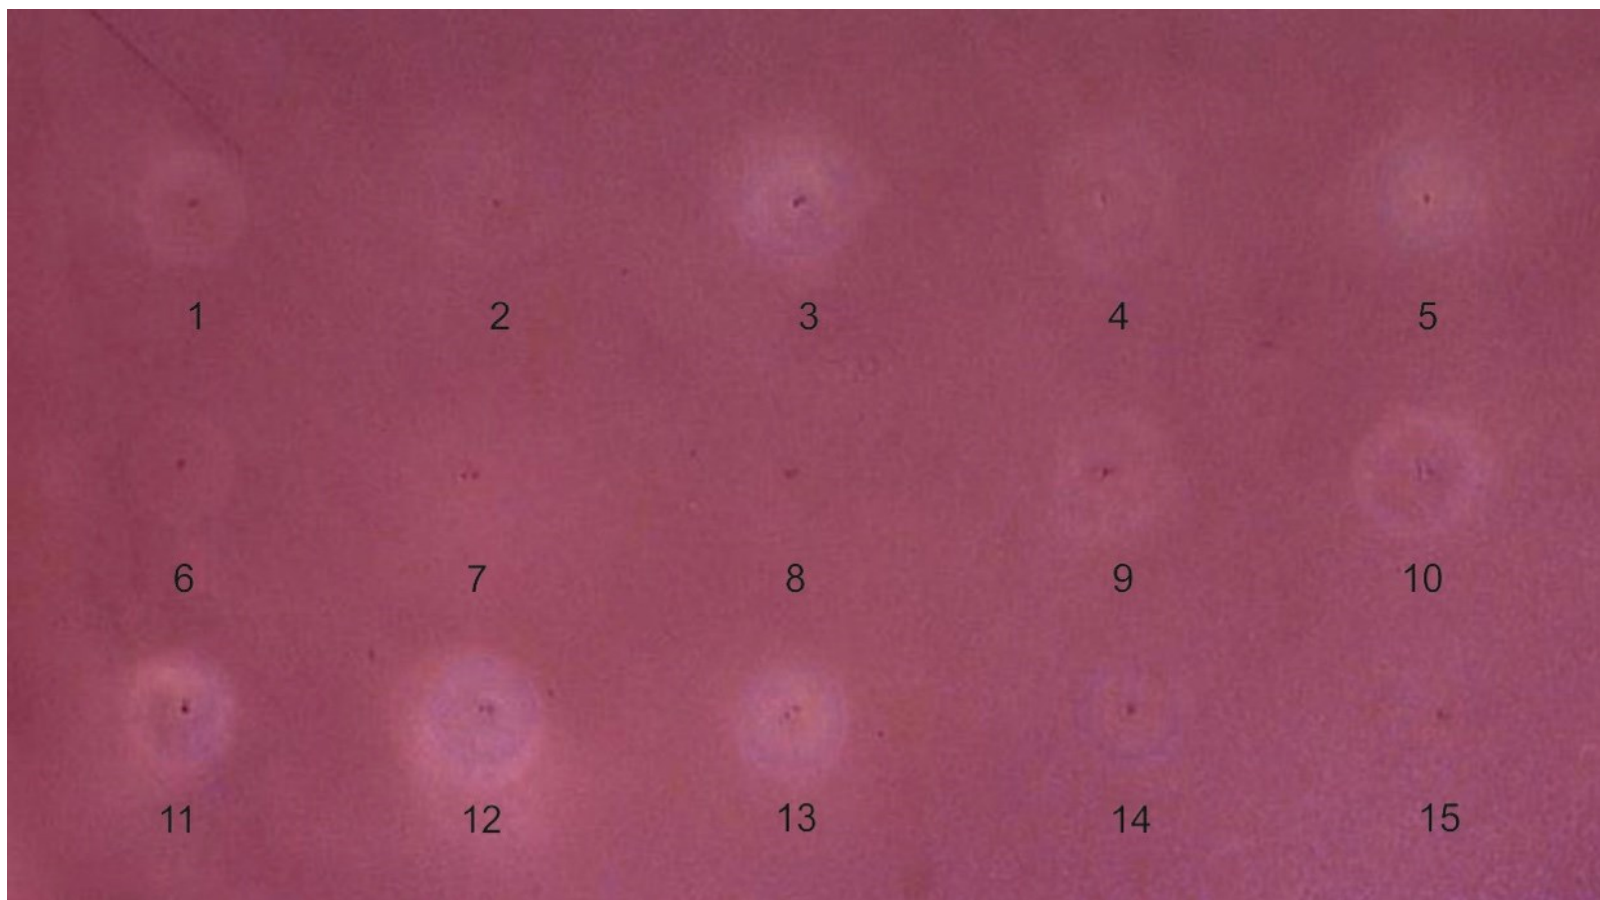

**Figure S3.**

Dot-blot AChE assay of lignans standards (VIS). 1. 6-o-Benzoilgomisin O 2. Epigomisin O 3. Gomisin A 4. Gomisin D 5. Gomisin G 6. Gomisin J 7. Gomisin N 8. Rubrisandrin A 9. Schisandrin 10. Schisandrin A 11. Schisandrin C 12. Schisanhenol 13. Schisantherin A 14. Schisantherin B 15. Wulignan A.

**Table S1.** The molecular formula, molecular weight and chemical structures of studied lignans

| Lignan name          | Molecular formula                              | Molecular weight | Chemical structure                                                                   |
|----------------------|------------------------------------------------|------------------|--------------------------------------------------------------------------------------|
| 6-O-Benzoylgomisin O | C <sub>30</sub> H <sub>32</sub> O <sub>8</sub> | 520.6            | 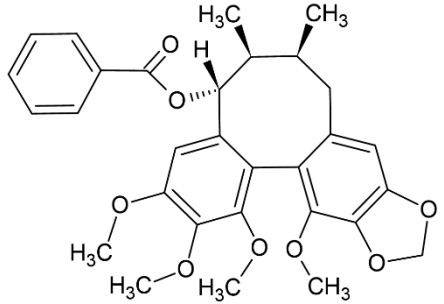  |
| Epigomisin O         | C <sub>23</sub> H <sub>28</sub> O <sub>7</sub> | 416.46           |  |

Fragransin A<sub>2</sub>C<sub>20</sub>H<sub>24</sub>O<sub>5</sub>

344.4

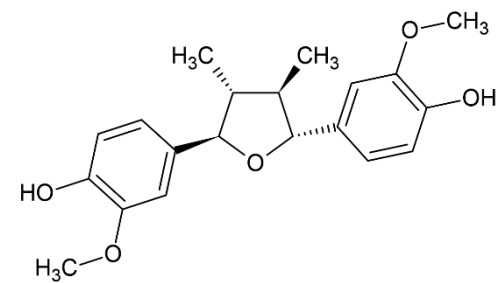

Gomisin A

C<sub>23</sub>H<sub>28</sub>O<sub>7</sub>

416.5

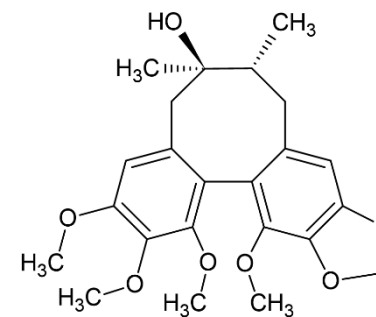

Gomisin D

C<sub>28</sub>H<sub>34</sub>O<sub>10</sub>

530.56

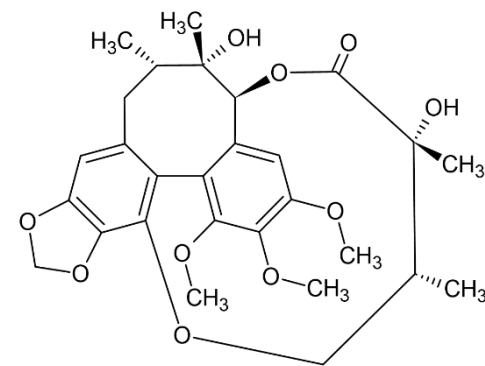

Gomisin G

 $C_{30}H_{32}O_9$ 

536.6

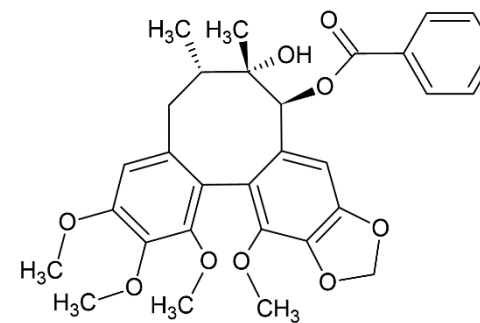

Gomisin J

 $C_{22}H_{28}O_6$ 

388.19

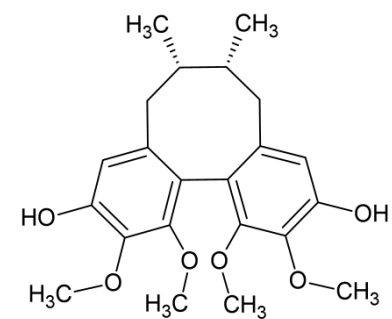

Gomisin N

 $C_{23}H_{28}O_6$ 

400.46

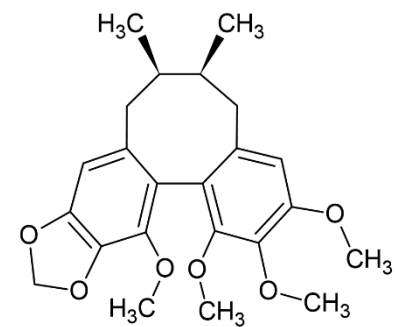

|           |                   |        |                                                                                      |
|-----------|-------------------|--------|--------------------------------------------------------------------------------------|
| Gomisin O | $C_{23}H_{28}O_7$ | 416.46 | 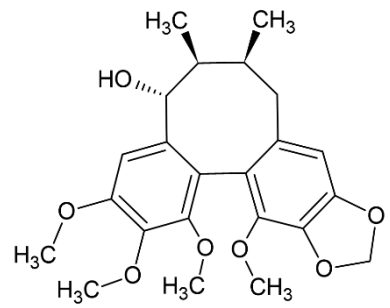  |
| Licarin A | $C_{20}H_{22}O_4$ | 326.4  |   |
| Licarin B | $C_{20}H_{20}O_4$ | 324.37 |  |



Pregomisin

$C_{22}H_{30}O_6$

390.47

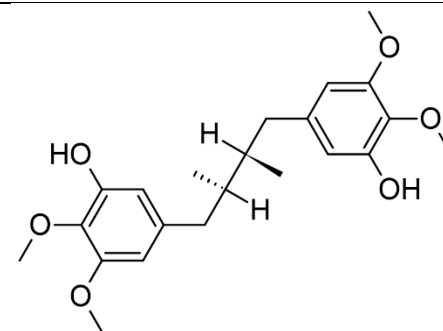

Rubriflorin A

$C_{30}H_{36}O_{10}$

556.6

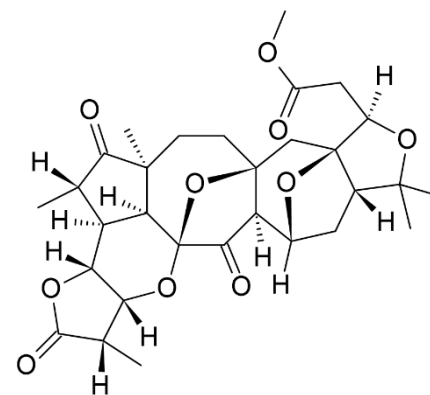

Rubrisandrin A

$C_{22}H_{28}O_6$

388.5

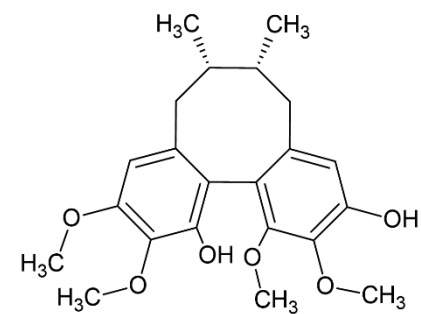

Schisandrin

 $C_{24}H_{32}O_7$ 

432.5

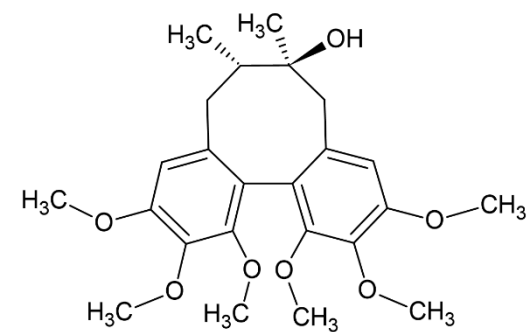

Schisandrin A

 $C_{24}H_{32}O_6$ 

416.51

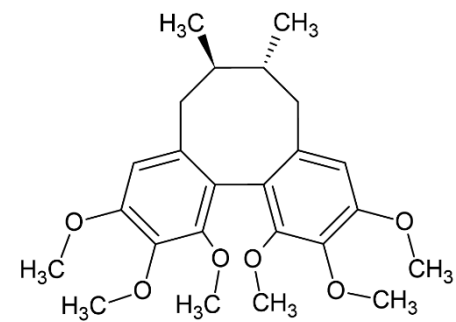

Schisandrin C

 $C_{23}H_{24}O_6$ 

384.42

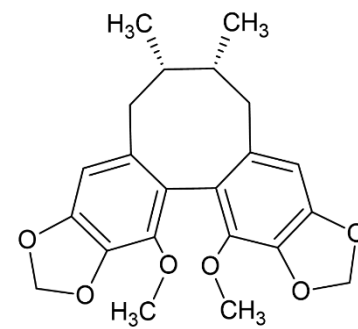

|                 |                   |        |                                                                                       |
|-----------------|-------------------|--------|---------------------------------------------------------------------------------------|
| Schisanhenol    | $C_{23}H_{30}O_6$ | 402.48 | 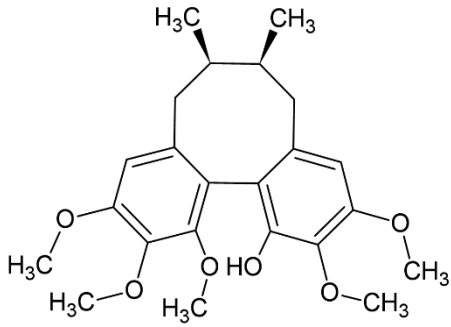   |
| Schisantherin A | $C_{30}H_{32}O_9$ | 536.56 |    |
| Schisantherin B | $C_{28}H_{34}O_9$ | 514.57 |  |

---

Wulignan A<sub>1</sub>

C<sub>20</sub>H<sub>22</sub>O<sub>5</sub>

342.4

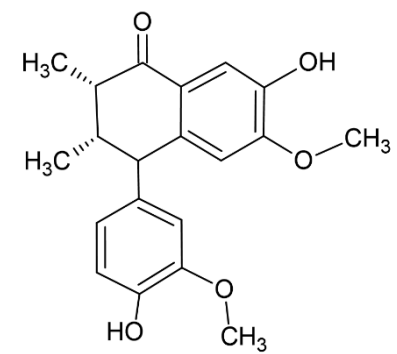

**Table S2.** The monitored fragmentation reactions (multiple reactions monitoring, MRM) for studied lignans. Ionization conditions applied: positive ionization (+ESI), drying gas temperature - 350°C, gas flow - 12 l/min, nebulizer pressure - 35 psi

| Lignans                   | Monoisotopic Mass (Da) | Type of ion                | Quantifier Transition | Fragmentor Voltage (V) | Collision energy (V) | Retention time $\pm$ SD (min) | MRM Time Segment |
|---------------------------|------------------------|----------------------------|-----------------------|------------------------|----------------------|-------------------------------|------------------|
| 6-O-Benzoylgomisin O      | 520.2                  | [M-C7H6O2+H] <sup>+</sup>  | 399.3\368.2           | 100                    | 150                  | 22.22 $\pm$ 0,01              | 6                |
| Epigomisin O              | 416.2                  | [M-H2O+H] <sup>+</sup>     | 399.3\368.2           | 100                    | 150                  | 11.95 $\pm$ 0,01              | 6                |
| Fragransin A <sub>2</sub> | 344.2                  | [M-21] <sup>+</sup>        | 323.2\152.0           | 100                    | 81                   | 18.98 $\pm$ 0,01              | 12               |
| Gomisin A                 | 416.2                  | [M-H2O+H] <sup>+</sup>     | 399.3\368.2           | 100                    | 150                  | 10.03 $\pm$ 0,01              | 6                |
| Gomisin D                 | 530.2                  | [M-C6H10O3+H] <sup>+</sup> | 401.3\168.0           | 150                    | 77                   | 8.52 $\pm$ 0,01               | 5                |
| Gomisin G                 | 536.2                  | [M-C7H6O2+H] <sup>+</sup>  | 415.3\371.1           | 150                    | 13                   | 10.99 $\pm$ 0,03              | 7                |
| Gomisin J                 | 388.2                  | [M+H] <sup>+</sup>         | 389.3\117.0           | 150                    | 77                   | 8.90 $\pm$ 0,01               | 5                |
| Gomisin N                 | 400.2                  | [M+H] <sup>+</sup>         | 401.3\168.0           | 150                    | 77                   | 20.81 $\pm$ 0,01              | 5                |
| Gomisin O                 | 416.2                  | [M-H2O+H] <sup>+</sup>     | 399.3\368.2           | 100                    | 130                  | 12.20 $\pm$ 0,01              | 8                |
| Licarin A                 | 326.2                  | [M+H] <sup>+</sup>         | 327.1/105.1           | 100                    | 130                  | 15.60 $\pm$ 0,01              | 10               |
| Licarin B                 | 324.1                  | [M+H] <sup>+</sup>         | 325.2\152.0           | 100                    | 130                  | 11.75 $\pm$ 0,04              | 8                |
| Pregomisin                | 390.2                  | [M+H] <sup>+</sup>         | 391.3\139.0           | 150                    | 61                   | 19.71 $\pm$ 0,02              | 5                |
| Rubriflorin A             | 556.2                  | [M+H] <sup>+</sup>         | 557.4\173.0           | 185                    | 65                   | 6.99 $\pm$ 0,03               | 4                |
| Rubrisandrin A            | 388.2                  | [M-19] <sup>+</sup>        | 369.3\351.1           | 109                    | 5                    | 6.37 $\pm$ 0,02               | 3                |
| Schisandrin               | 432.2                  | [M-H2O+H] <sup>+</sup>     | 415.3\359.2           | 150                    | 13                   | 7.97 $\pm$ 0,01               | 5                |
| Schisandrin A             | 416.2                  | [M+H] <sup>+</sup>         | 417.3\316.2           | 160                    | 21                   | 17.97 $\pm$ 0,01              | 11               |
| Schisandrin C             | 384.2                  | [M+H] <sup>+</sup>         | 385.3\231.1           | 130                    | 17                   | 22.70 $\pm$ 0,01              | 16               |
| Schisanhenol              | 402.2                  | [M+H] <sup>+</sup>         | 403.3\231.0           | 150                    | 130                  | 14.98 $\pm$ 0,01              | 10               |
| Schisantherin A           | 536.2                  | [M-C7H6O2+H] <sup>+</sup>  | 415.3\371.1           | 150                    | 13                   | 13.56 $\pm$ 0,01              | 7                |
| Schisantherin B           | 514.2                  | [M-C5H8O2+H] <sup>+</sup>  | 415.3\371.1           | 150                    | 13                   | 13.97 $\pm$ 0,01              | 7                |
| Wulignan A <sub>1</sub>   | 342.1                  | [M+H] <sup>+</sup>         | 343.3\117.0           | 99                     | 90                   | 5.31 $\pm$ 0,01               | 2                |

**Table S3.** Calibration parameters for tested compounds

| Lignans                   | Calibration curve equation<br>(Linear model) | Coefficient of determination<br>(R <sup>2</sup> ) | Tested linear range<br>(ug/ml) | LOD<br>(ug/ml) | LOQ<br>(ug/ml) | Sample matrix | Spiked concentration<br>(ug/ml) | Recovery (%) | RSD (%) |
|---------------------------|----------------------------------------------|---------------------------------------------------|--------------------------------|----------------|----------------|---------------|---------------------------------|--------------|---------|
| 6-O-Benzoylgomisin O      | y = 84527x + 617.85                          | 0.9982                                            | 0.1~30                         | 0.004          | 0.012          | Leaves (M)    | 3.89                            | 99.27        | 0.69    |
|                           |                                              |                                                   |                                |                |                | Leaves (F)    |                                 | 100.45       | 0.56    |
|                           |                                              |                                                   |                                |                |                | Fruits        |                                 | 102.13       | 1.57    |
| Epigomisin O              | y = 63954x - 141.21                          | 0.999                                             | 0.1~30                         | 0.005          | 0.016          | Leaves (M)    | 3.41                            | 99.99        | 0.01    |
|                           |                                              |                                                   |                                |                |                | Leaves (F)    |                                 | 100.01       | 0.03    |
|                           |                                              |                                                   |                                |                |                | Fruits        |                                 | 100.16       | 0.06    |
| Fragransin A <sub>2</sub> | y = 1515x - 87.184                           | 0.9986                                            | 0.1~30                         | 0.218          | 0.660          | Leaves (M)    | 5.29                            | 99.35        | 0.86    |
|                           |                                              |                                                   |                                |                |                | Leaves (F)    |                                 | 98.81        | 0.96    |
|                           |                                              |                                                   |                                |                |                | Fruits        |                                 | 99.03        | 0.89    |
| Gomisin A                 | y = 78291x + 25645                           | 0.9985                                            | 0.1~30                         | 0.004          | 0.013          | Leaves (M)    | 3.68                            | 100.38       | 1.04    |
|                           |                                              |                                                   |                                |                |                | Leaves (F)    |                                 | 100.39       | 1.04    |
|                           |                                              |                                                   |                                |                |                | Fruits        |                                 | 91.89        | 6.17    |
| Gomisin D                 | y = 1089.3x - 289.56                         | 0.9976                                            | 0.1~30                         | 0.079          | 0.239          | Leaves (M)    | 3.46                            | 100.10       | 0.35    |
|                           |                                              |                                                   |                                |                |                | Leaves (F)    |                                 | 100.29       | 0.25    |
|                           |                                              |                                                   |                                |                |                | Fruits        |                                 | 92.62        | 4.04    |
| Gomisin G                 | y = 40343x - 704.94                          | 0.9974                                            | 0.1~30                         | 0.008          | 0.025          | Leaves (M)    | 3.46                            | 100.06       | 0.12    |
|                           |                                              |                                                   |                                |                |                | Leaves (F)    |                                 | 99.99        | 0.15    |
|                           |                                              |                                                   |                                |                |                | Fruits        |                                 | 94.59        | 2.04    |
| Gomisin J                 | y = 4192.4x - 245.16                         | 0.9981                                            | 0.1~30                         | 0.079          | 0.239          | Leaves (M)    | 3.70                            | 100.05       | 0.05    |
|                           |                                              |                                                   |                                |                |                | Leaves (F)    |                                 | 100.04       | 0.05    |
|                           |                                              |                                                   |                                |                |                | Fruits        |                                 | 89.56        | 5.32    |
| Gomisin N                 | y = 17063x - 345.78                          | 0.9993                                            | 0.1~30                         | 0.019          | 0.059          | Leaves (M)    | 3.81                            | 105.05       | 5.46    |
|                           |                                              |                                                   |                                |                |                | Leaves (F)    |                                 | 105.05       | 5.46    |
|                           |                                              |                                                   |                                |                |                | Fruits        |                                 | 86.17        | 8.15    |
| Gomisin O                 | y = 76380x - 1167.7                          | 0.9981                                            | 0.1~30                         | 0.004          | 0.013          | Leaves (M)    | 3.74                            | 100.01       | 0.02    |
|                           |                                              |                                                   |                                |                |                | Leaves (F)    |                                 | 100.06       | 0.06    |
|                           |                                              |                                                   |                                |                |                | Fruits        |                                 | 94.94        | 4.99    |
| Licarlin A                | y = 3485.2x - 273.51                         | 0.9978                                            | 0.1~30                         | 0.095          | 0.287          | Leaves (M)    | 5.42                            | 100.04       | 0.02    |

| Lignans         | Calibration curve equation<br>(Linear model) | Coefficient of<br>determination<br>(R <sup>2</sup> ) | Tested linear<br>range<br>(ug/ml) | LOD<br>(ug/ml) | LOQ<br>(ug/ml) | Sample matrix | Spiked<br>concentration<br>(ug/ml) | Recovery (%) | RSD (%) |
|-----------------|----------------------------------------------|------------------------------------------------------|-----------------------------------|----------------|----------------|---------------|------------------------------------|--------------|---------|
| Licarin B       | y = 839.82x + 87.382                         | 0.9986                                               | 0.1~30                            | 0.039          | 0.119          | Leaves (F)    | 1.92                               | 100.03       | 0.02    |
|                 |                                              |                                                      |                                   |                |                | Fruits        |                                    | 99.99        | 0.01    |
|                 |                                              |                                                      |                                   |                |                | Leaves (M)    |                                    | 100.40       | 0.19    |
|                 |                                              |                                                      |                                   |                |                | Leaves (F)    |                                    | 100.65       | 0.28    |
|                 |                                              |                                                      |                                   |                |                | Fruits        |                                    | 98.99        | 0.43    |
|                 |                                              |                                                      |                                   |                |                | Leaves (M)    |                                    | 100.04       | 0.10    |
| Pregomisin      | y = 3993.4x - 138.18                         | 0.9999                                               | 0.1~30                            | 0.083          | 0.250          | Leaves (F)    | 4.19                               | 100.03       | 0.10    |
|                 |                                              |                                                      |                                   |                |                | Fruits        |                                    | 100.06       | 0.13    |
|                 |                                              |                                                      |                                   |                |                | Leaves (M)    |                                    | 100.23       | 0.26    |
| Rubriflorin A   | y = 14161x + 3460.4                          | 0.9984                                               | 0.1~30                            | 0.023          | 0.071          | Leaves (F)    | 3.39                               | 100.23       | 0.28    |
|                 |                                              |                                                      |                                   |                |                | Fruits        |                                    | 99.47        | 0.62    |
|                 |                                              |                                                      |                                   |                |                | Leaves (M)    |                                    | 100.00       | 0.03    |
| Rubrisandrin A  | y = 27485x + 346.46                          | 0.9999                                               | 0.1~30                            | 0.012          | 0.036          | Leaves (F)    | 3.54                               | 100.01       | 0.03    |
|                 |                                              |                                                      |                                   |                |                | Fruits        |                                    | 99.98        | 0.02    |
|                 |                                              |                                                      |                                   |                |                | Leaves (M)    |                                    | 100.16       | 0.31    |
| Schisandrin     | y = 17578x + 6671.3                          | 0.9972                                               | 0.1~30                            | 0.019          | 0.057          | Leaves (F)    | 3.93                               | 100.16       | 0.31    |
|                 |                                              |                                                      |                                   |                |                | Fruits        |                                    | 90.92        | 5.98    |
|                 |                                              |                                                      |                                   |                |                | Leaves (M)    |                                    | 100.10       | 0.11    |
| Schisandrin A   | y = 276081x - 832.02                         | 0.9975                                               | 0.1~30                            | 0.001          | 0.004          | Leaves (F)    | 3.67                               | 100.10       | 0.11    |
|                 |                                              |                                                      |                                   |                |                | Fruits        |                                    | 97.54        | 7.54    |
|                 |                                              |                                                      |                                   |                |                | Leaves (M)    |                                    | 98.54        | 0.95    |
| Schisandrin C   | y = 1342.4x - 24.449                         | 0.9963                                               | 0.1~30                            | 0.246          | 0.745          | Leaves (F)    | 3.63                               | 98.70        | 0.99    |
|                 |                                              |                                                      |                                   |                |                | Fruits        |                                    | 99.73        | 0.69    |
|                 |                                              |                                                      |                                   |                |                | Leaves (M)    |                                    | 99.99        | 0.02    |
| Schisanhenol    | y = 2469.4x - 272.74                         | 0.9951                                               | 0.1~30                            | 0.134          | 0.405          | Leaves (F)    | 3.58                               | 100.00       | 0.03    |
|                 |                                              |                                                      |                                   |                |                | Fruits        |                                    | 92.08        | 7.86    |
|                 |                                              |                                                      |                                   |                |                | Leaves (M)    |                                    | 100.32       | 0.27    |
| Schisantherin A | y = 58357x - 1127.4                          | 0.9993                                               | 0.1~30                            | 0.06           | 0.17           | Leaves (F)    | 3.47                               | 100.95       | 0.97    |
|                 |                                              |                                                      |                                   |                |                | Fruits        |                                    | 98.96        | 0.44    |
|                 |                                              |                                                      |                                   |                |                | Leaves (M)    |                                    | 99.15        | 5.94    |

| Lignans                 | Calibration curve equation<br>(Linear model) | Coefficient of<br>determination<br>(R <sup>2</sup> ) | Tested linear<br>range<br>(ug/ml) | LOD<br>(ug/ml) | LOQ<br>(ug/ml) | Sample matrix | Spiked<br>concentration<br>(ug/ml) | Recovery (%) | RSD (%) |
|-------------------------|----------------------------------------------|------------------------------------------------------|-----------------------------------|----------------|----------------|---------------|------------------------------------|--------------|---------|
| Wulignan A <sub>1</sub> | y = 5863x + 346.24                           | 0.9993                                               | 0.1~30                            | 0.056          | 0.171          | Leaves (F)    | 3.90                               | 102.35       | 7.45    |
|                         |                                              |                                                      |                                   |                |                | Fruits        |                                    | 89.72        | 1.13    |
|                         |                                              |                                                      |                                   |                |                | Leaves (M)    |                                    | 99.99        | 0.05    |
|                         |                                              |                                                      |                                   |                |                | Leaves (F)    |                                    | 100.04       | 0.04    |
|                         |                                              |                                                      |                                   |                |                | Fruits        |                                    | 100.11       | 0.11    |

LOD – limit of detection  $3.3 \times S/a$ ; LOQ limit of quantitation  $10 \times S/a$ ; where S – standard deviation of blank sample, a- sensitivity (slope of calibration curve).

The recovery influenced by matrix effects was examined by comparing the MS signals (peak areas) for two sets of samples: lignans solutions in methanol and sample extracts spiked with lignans.

RSD relative standard deviation (n = 7 for leaves and n = 3 for fruits).



**Table S4.** Lignan contents vs their activities in AChE inhibition dot-blot test and information on their activities found in the literature

| Lignans                   | Part of the plant | Lignan contents [mg/100g DW] |        | Dot-blot AChE | Reference [27]* |
|---------------------------|-------------------|------------------------------|--------|---------------|-----------------|
|                           |                   | VI                           | VII    |               |                 |
| 6-O-Benzoylgomisin O      | Leaves (M)        | 0.12                         | 20.96  | ++            |                 |
|                           | Leaves (F)        | 4.18                         | 37.91  |               |                 |
|                           | Fruits            | 1.43                         | 32.06  |               |                 |
| Epigomisin O              | Leaves (M)        | 1.77                         | 0.85   | +             |                 |
|                           | Leaves (F)        | 5.08                         | 0.56   |               |                 |
|                           | Fruits            | 6.82                         | 6.22   |               |                 |
| Fragransin A <sub>2</sub> | Leaves (M)        | tr                           | tr     |               |                 |
|                           | Leaves (F)        | 0.05                         | tr     |               |                 |
|                           | Fruits            | tr                           | tr     |               |                 |
| Gomisin A                 | Leaves (M)        | 2.15                         | 0.01   | +++           | +               |
|                           | Leaves (F)        | 5.76                         | 0.05   |               |                 |
|                           | Fruits            | 1.85                         | 0.02   |               |                 |
| Gomisin D                 | Leaves (M)        | 14.04                        | 7.29   | ++            | +               |
|                           | Leaves (F)        | 6.82                         | 4.01   |               |                 |
|                           | Fruits            | 3.08                         | 4.49   |               |                 |
| Gomisin G                 | Leaves (M)        | 0.12                         | 3.08   | +++           | +               |
|                           | Leaves (F)        | 5.17                         | 3.30   |               |                 |
|                           | Fruits            | 82.47                        | 114.00 |               |                 |
| Gomisin J                 | Leaves (M)        | 0.17                         | 0.22   | +             | -               |
|                           | Leaves (F)        | 0.95                         | 0.36   |               |                 |
|                           | Fruits            | 2.60                         | 8.50   |               |                 |
| Gomisin N                 | Leaves (M)        | 0.14                         | 8.10   | +             | -               |
|                           | Leaves (F)        | 1.13                         | 8.70   |               |                 |
|                           | Fruits            | 30.05                        | 485.51 |               |                 |
| Gomisin O                 | Leaves (M)        | 1.17                         | 2.89   |               |                 |
|                           | Leaves (F)        | 9.74                         | 2.06   |               |                 |
|                           | Fruits            | 76.06                        | 73.03  |               |                 |

|                         |            |        |        |     |   |
|-------------------------|------------|--------|--------|-----|---|
| Licarin A               | Leaves (M) | 0.17   | 0.22   |     |   |
|                         | Leaves (F) | 0      | 0.32   |     |   |
|                         | Fruits     | 0.05   | 0.19   |     |   |
| Licarin B               | Leaves (M) | 0.07   | 0.02   |     |   |
|                         | Leaves (F) | 0.10   | 0.02   |     |   |
|                         | Fruits     | 1.63   | 1.68   |     |   |
| Pregomisin              | Leaves (M) | tr     | tr     |     |   |
|                         | Leaves (F) | tr     | tr     |     |   |
|                         | Fruits     | tr     | tr     |     |   |
| Rubriflorin A           | Leaves (M) | tr     | tr     |     |   |
|                         | Leaves (F) | tr     | tr     |     |   |
|                         | Fruits     | tr     | tr     |     |   |
| Rubrisandrin A          | Leaves (M) | 1.34   | 0.78   |     |   |
|                         | Leaves (F) | 0.17   | 0.22   | +   | - |
|                         | Fruits     | 0.27   | 0.80   |     |   |
| Schisandrin             | Leaves (M) | 3.25   | 0.02   |     |   |
|                         | Leaves (F) | 1.51   | 0.05   | ++  | - |
|                         | Fruits     | 6.75   | 0.02   |     |   |
| Schisandrin A           | Leaves (M) | 0.22   | 1.68   |     |   |
|                         | Leaves (F) | 1.36   | 2.50   | ++  | - |
|                         | Fruits     | 23.41  | 143.14 |     |   |
| Schisandrin C           | Leaves (M) | tr     | 0.27   |     |   |
|                         | Leaves (F) | tr     | 0.70   | +++ |   |
|                         | Fruits     | 0.24   | 10.56  |     |   |
| Schisanhenol            | Leaves (M) | 0.95   | 1.46   |     |   |
|                         | Leaves (F) | 1.58   | 1.87   | +++ |   |
|                         | Fruits     | 124.54 | 327.01 |     |   |
| Schisantherin A         | Leaves (M) | 55.47  | 32.47  |     |   |
|                         | Leaves (F) | 157.30 | 17.61  | +++ | + |
|                         | Fruits     | 13.99  | 15.59  |     |   |
| Schisantherin B         | Leaves (M) | 5.41   | 4.65   |     |   |
|                         | Leaves (F) | 16.15  | 4.36   | +   |   |
|                         | Fruits     | 6.54   | 10.18  |     |   |
| Wulignan A <sub>1</sub> | Leaves (M) | 0.02   | 0.01   |     |   |
|                         | Leaves (F) | 0.03   | 0.01   | +   |   |
|                         | Fruits     | 27.30  | 0.24   |     |   |

+ low activity  
++ high activity  
+++ very high activity  
- no activity

\* [27] - Hung, T.M.; Na, M.; Min, B.S.; Ngoc, T.M.; Lee, I.S.; Zhang, X.; Bae, K. Acetylcholinesterase inhibitory effect of lignans isolated from *Schizandra chinensis*. *Arch. Pharm. Res.* **2007**, *30*, 685–690, doi:10.1007/bf02977628.
